# Supplementary material for: Cryo-EM structure of a thermostable bacterial nanocompartment
Source: PubMed Central journal article supplement (PMC8086157; doi:10.1107/s2052252521001949), 2021-04-02
Supplement: m-08-00342-sup1.pdf [file m-08-00342-sup1.pdf]

# IUCrJ

**Volume 8 (2021)**

**Supporting information for article:**

**Cryo-EM structure of a thermostable bacterial nanocompartment**

**Timothy Wiryaman and Navtej Toor**

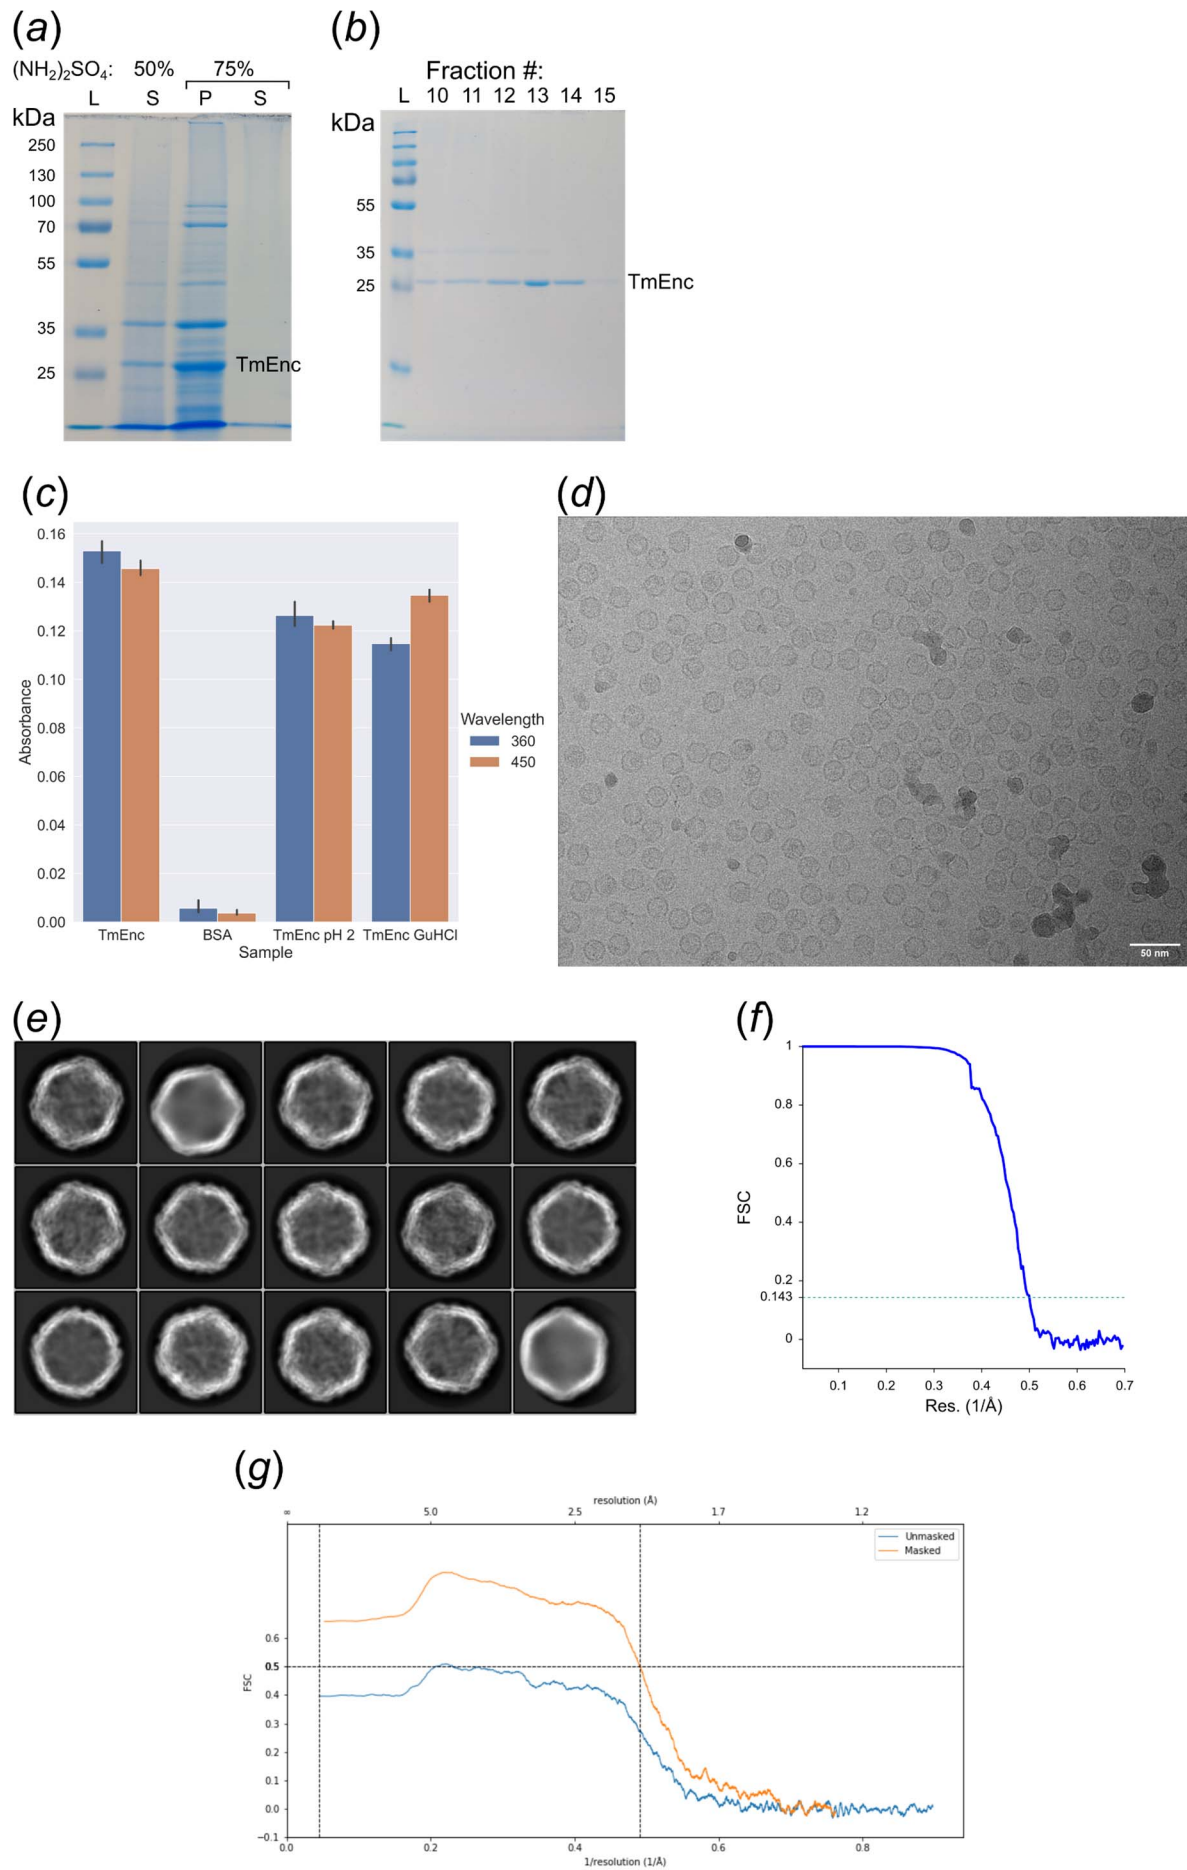

**Figure S1** (a) 10% SDS-polyacrylamide gel of TmEnc during ammonium sulfate precipitation step in purification. Percentages above lanes indicate the ammonium sulfate saturation. S refers to the supernatant and P refers to the pellet after incubating the protein solution with ammonium sulfate and centrifuging. (b) 12% SDS-polyacrylamide gel of fractions collected after purifying TmEnc on a HiPrep Sephacryl S-500 column. (c) UV-vis absorption at 360 nm and 450 nm for TmEnc, TmEnc diluted in pH 2.0 buffer, TmEnc diluted in 8 M guanidine hydrochloride, and bovine serum albumin (BSA). Error bars are 95% confidence intervals. (d) Representative micrograph of TmEnc from cryo-EM data collection. The micrograph was low-pass filtered to 20 Å. (e) 2D class averages of *crYOLO*-picked particles calculated by *RELION*. (f) Fourier shell correlation of two half-maps refined independently in *RELION*. (g) Map-to-model Fourier shell correlation after refinement in *PHENIX*.

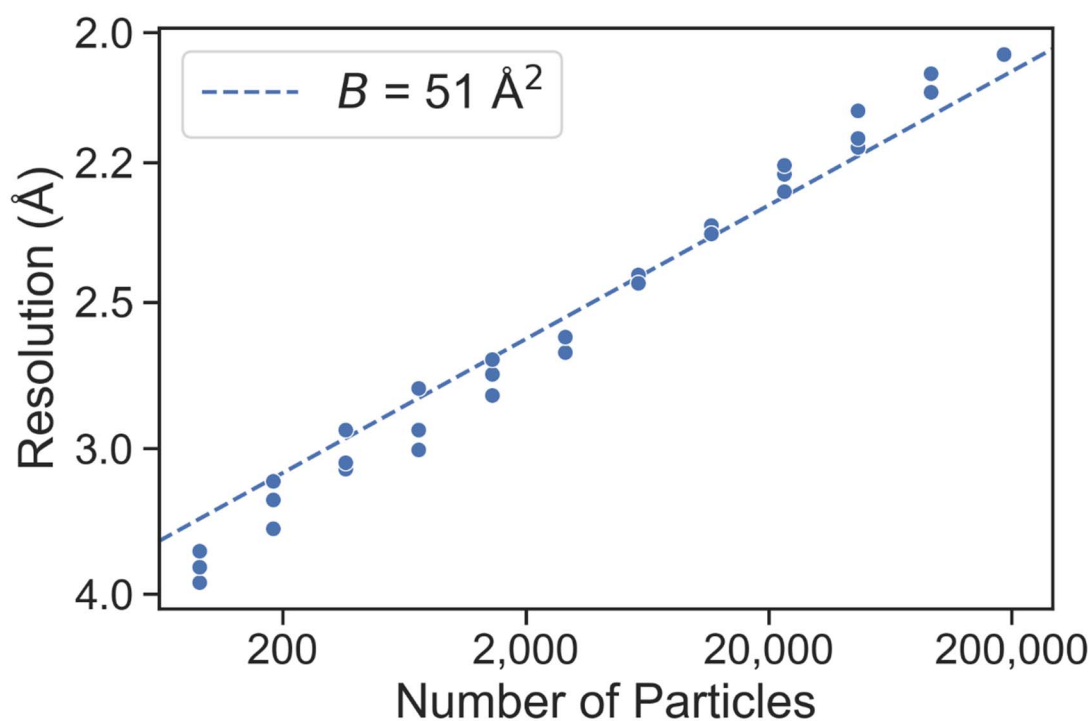

**Figure S2** Particle subsets were taken from the final polished particles and refined in *RELION*. The resolution as a function of the number of particles is shown on a Henderson-Rosenthal *B*-factor plot. The estimated *B*-factor from linear regression is 51.3 Å<sup>2</sup>.

**Table S1** Amino acid content, expressed in percentages, of TmEnc, MhEnc, SeEnc, and QsEnc.

| Name                              | TmEnc  | MhEnc  | SeEnc  | QsEnc      |
|-----------------------------------|--------|--------|--------|------------|
| Uniprot Accession                 | Q9WZP2 | K5BEG2 | Q55032 | A0A0F5HPP7 |
| PDB ID                            | 7KQ5   | 3I9G   | 6X8M   | 6NJ8       |
| A                                 | 4.53   | 10.19  | 7.52   | 6.03       |
| C                                 | 1.13   | 0.75   | 0.98   | 0.35       |
| D                                 | 5.66   | 8.68   | 5.56   | 6.74       |
| E                                 | 13.21  | 6.79   | 5.88   | 8.16       |
| F                                 | 5.66   | 2.64   | 2.29   | 5.32       |
| G                                 | 7.17   | 6.42   | 5.23   | 6.03       |
| H                                 | 0.75   | 2.64   | 1.96   | 2.84       |
| I                                 | 6.42   | 5.66   | 4.90   | 6.03       |
| K                                 | 7.17   | 2.26   | 2.61   | 3.90       |
| L                                 | 12.08  | 9.43   | 12.09  | 10.28      |
| M                                 | 0.38   | 0.38   | 1.31   | 3.19       |
| N                                 | 2.64   | 1.51   | 4.90   | 5.67       |
| P                                 | 3.77   | 5.66   | 6.21   | 4.26       |
| Q                                 | 1.89   | 2.26   | 4.58   | 3.90       |
| R                                 | 6.79   | 7.17   | 7.84   | 6.03       |
| S                                 | 4.53   | 6.79   | 5.56   | 5.67       |
| T                                 | 4.91   | 7.17   | 6.54   | 3.90       |
| V                                 | 7.17   | 9.43   | 9.15   | 7.45       |
| W                                 | 1.89   | 1.13   | 1.31   | 0.71       |
| Y                                 | 2.26   | 3.02   | 3.59   | 3.55       |
| Negative (D+E)                    | 18.87  | 15.47  | 11.44  | 14.89      |
| Positive (H+K+R)                  | 14.72  | 12.08  | 12.42  | 12.77      |
| Charged total (D+E+H+K+R)         | 33.58  | 27.55  | 23.86  | 27.66      |
| Polar uncharged (S+T+N+Q)         | 13.96  | 17.74  | 21.57  | 19.15      |
| Aliphatic/hydrophobic (A+I+L+M+V) | 30.57  | 35.09  | 34.97  | 32.98      |
| Aromatic (F+W+Y)                  | 9.81   | 6.79   | 7.19   | 9.57       |
